# Supplementary material for: Metagenome-assembled genomes and gene catalog from the chicken gut microbiome aid in deciphering antibiotic resistomes
Source: PubMed Central journal article supplement (PMC8602611; doi:10.1038/s42003-021-02827-2), 2021-11-18
Supplement: 42003_2021_2827_MOESM3_ESM.pdf [file 42003_2021_2827_MOESM3_ESM.pdf]

## Description of Additional Supplementary Files

**File name:** Supplementary Data 1

**Description:** Metagenomic data available in the present study.

**File name:** Supplementary Data 2

**Description:** Statistics of the assembled contigs.

**File name:** Supplementary Data 3

**Description:** Basic statistics of the 12,339 MAGs.

**File name:** Supplementary Data 4

**Description:** Taxonomy of the 1,978 MAGs at the species level.

**File name:** Supplementary Data 5

**Description:** Novel genera assembled in the present study.

**File name:** Supplementary Data 6

**Description:** The phylogenetic tree of archaeal genomes at the strain level in newick format.

**File name:** Supplementary Data 7

**Description:** Read mapping rates of 799 samples against the 12,339 MAGs.

**File name:** Supplementary Data 8

**Description:** Statistics of clean reads in 799 samples.

**File name:** Supplementary Data 9

**Description:** The number of MAGs distributed among different countries.

**File name:** Supplementary Data 10

**Description:** The number of 535 shared MAGs in different genera.

**File name:** Supplementary Data 11

**Description:** The number of genes annotated by the eggNOG and the KEGG in the two gene catalogues.

**File name:** Supplementary Data 12

**Description:** The ratio of genes assigned to different COG categories in the two gene catalogues.

**File name:** Supplementary Data 13

**Description:** Distribution of plasmids among 477 samples.

**File name:** Supplementary Data 14

**Description:** Annotations of major VFs found in the gut microbiome of chickens.

**File name:** Supplementary Data 15

**Description:** The number of ARGs found in the 12,339 MAGs.

**File name:** Supplementary Data 16

**Description:** Predicted gene flow of ARGs at the family level.

**File name:** Supplementary Data 17

**Description:** Coverage of different colistin resistance genes in 799 samples.
